# Supplementary material for: Validating Discriminative Signatures for Obstructive Sleep Apnea in Exhaled Breath
Source: MDPI journal article supplement (doi:10.3390/cells11192982), 2022-09-24
Supplement: s1 [file s1]

## Supplemental Material

# **Validating Discriminative Signatures for Obstructive Sleep Apnea in Exhaled Breath**

Bettina Streckenbach<sup>1†</sup>, Martin Osswald<sup>2†</sup>, Stefan Malesevic<sup>2</sup>, Renato Zenobi<sup>1</sup>, Malcolm Kohler<sup>2\*</sup>

<sup>1</sup>ETH Zurich, Department of Chemistry and Applied Biosciences, 8093 Zurich, Switzerland

<sup>2</sup>Department of Pulmonology, University Hospital Zurich, 8091 Zurich, Switzerland

† These authors contributed equally to this work.

\*corresponding author: malcolm.kohler@usz.ch

The following inclusion and exclusion criteria were applied for participant screening as listed in Table S1.

**Table S1:** Inclusion and exclusion criteria for study participants.

|                         | Inclusion Criteria |                   |                                                        | Exclusion Criteria                                                                                                                 |
|-------------------------|--------------------|-------------------|--------------------------------------------------------|------------------------------------------------------------------------------------------------------------------------------------|
| study cohort            | Age                | AHI               | current condition                                      | condition/ comorbidities                                                                                                           |
| <b>OSA untreated</b>    | ≥ 18               | ≥ 15 <sup>a</sup> | OSA without CPAP treatment or other treatments for OSA | central or mixed sleep apnea<br>pregnancy<br>malignom<br>lung cancer<br>lung transplant                                            |
| <b>OSA treated</b>      | ≥ 18               | ≥ 15 <sup>a</sup> | OSA with CPAP treatment                                | interstitial lung disease<br>chronic obstructive lung disease (COPD, asthma)<br>hypoventilation (e.g., adipositas hypoventilation) |
| <b>healthy controls</b> | ≥ 18               | ≤ 5               | no clinical OSA                                        | chronic inflammatory disease<br>relevant congenital defect<br>renal failure<br>drug abuse                                          |

AHI: apnea/hypopnea index (events/h), OSA: obstructive sleep apnea, CPAP: continuous positive airway pressure, COPD: chronic obstructive pulmonary disease, <sup>a</sup>AHI values at diagnosis.

**Table S2:** Most prevalent comorbidities and concomitant medications.

|                               | OSA untreated<br>(N=43) | OSA treated<br>(N=43) | Control subjects<br>(N=32) |
|-------------------------------|-------------------------|-----------------------|----------------------------|
| <b>Comorbidities</b>          |                         |                       |                            |
| Depression                    | 6 (14)                  | 4 (9)                 | 6 (19)                     |
| Diabetes mellitus             | 8 (19)                  | 6 (14)                | 2 (6)                      |
| Hypertension                  | 19 (44)                 | 23 (53)               | 10 (31)                    |
| Thyroid dysfunction           | 1 (2)                   | 3 (7)                 | 3 (9)                      |
| <b>Concomitant medication</b> |                         |                       |                            |
| Antidepressants               | 7 (16)                  | 8 (19)                | 9 (28)                     |
| Antidiabetics                 | 9 (21)                  | 7 (16)                | 4 (13)                     |
| Antihypertensiva              | 27 (63)                 | 29 (67)               | 13 (41)                    |

Values are presented as number (%) per study group, OSA = obstructive sleep apnea.

# Confirmed OSA-associated metabolites

**Table S3:** Confirmed m/z features in the validation study.

|    | m/z      | metabolite                     | Signif. | in untreated<br>OSA | P value | FC   |
|----|----------|--------------------------------|---------|---------------------|---------|------|
| 1  | 69.0693  | n.a.                           | no      |                     | 0.854   | 1.02 |
| 2  | 71.0487  | n.a.                           | no      |                     | 0.739   | 1.31 |
| 3  | 79.0409  | n.a.                           | no      |                     | 1.000   | 1.19 |
| 4  | 81.0328  | n.a.                           | yes     | increased           | 0.012   | 1.49 |
| 5  | 81.0525  | n.a.                           | no      |                     | 0.818   | 1.23 |
| 6  | 83.0854  | n.a.                           | no      |                     | 0.688   | 1.32 |
| 7  | 87.0439  | n.a.                           | no      |                     | 0.083   | 1.22 |
| 8  | 91.0413  | n.a.                           | no      |                     | 0.973   | 1.01 |
| 9  | 93.0574  | n.a.                           | no      |                     | 0.484   | 1.53 |
| 10 | 95.0494  | n.a.                           | yes     | increased           | 0.022   | 1.33 |
| 11 | 97.0647  | 2-ethylfuran                   | no      |                     | 0.079   | 1.44 |
| 12 | 101.0598 | n.a.                           | yes     | increased           | 0.031   | 1.22 |
| 13 | 102.0913 | 2-pentenal ([M+NH4]+)          | no      |                     | 0.845   | 1.03 |
| 14 | 105.0551 | n.a.                           | no      |                     | 0.211   | 1.14 |
| 15 | 109.0648 | n.a.                           | no      |                     | 0.558   | 0.81 |
| 16 | 111.0803 | 2-propylfuran                  | no      |                     | 0.087   | 1.49 |
| 17 | 123.1165 | n.a.                           | no      |                     | 0.801   | 1.13 |
| 18 | 125.0958 | 2-butylfuran                   | yes     | increased           | 0.029   | 1.44 |
| 19 | 128.0701 | n.a.                           | yes     | increased           | 0.006   | 1.49 |
| 20 | 129.0908 | 4-hydroxy-2-heptenal           | no      |                     | 0.323   | 1.59 |
| 21 | 136.0216 | benzothiazole                  | no      |                     | 0.081   | 1.37 |
| 22 | 137.0593 | n.a.                           | no      |                     | 0.081   | 1.77 |
| 23 | 138.0571 | n.a.                           | no      |                     | 0.081   | 0.96 |
| 24 | 139.1116 | 2-pentylfuran                  | no      |                     | 0.491   | 1.15 |
| 25 | 143.1063 | 4-hydroxy-2-octenal ([M+NH4]+) | no      |                     | 0.139   | 3.25 |
| 26 | 149.0971 | n.a.                           | no      |                     | 0.927   | 1.37 |
| 27 | 151.1116 | n.a.                           | no      |                     | 0.696   | 0.77 |
| 28 | 152.0699 | n.a.                           | yes     | increased           | 0.018   | 1.48 |
| 29 | 160.0611 | n.a.                           | no      |                     | 0.073   | 1.25 |
| 30 | 160.1329 | 4-hydroxy-2-octenal            | no      |                     | 0.054   | 6.13 |
| 31 | 167.1064 | n.a.                           | no      |                     | 0.513   | 0.92 |
| 32 | 169.0867 | n.a.                           | yes     | increased           | 0.020   | 1.36 |
| 33 | 175.1117 | n.a.                           | yes     | increased           | 0.037   | 1.42 |
| 34 | 195.1379 | 4-(hexyloxy)phenol             | yes     | increased           | 0.042   | 1.32 |
| 35 | 208.1776 | n.a.                           | no      |                     | 0.075   | 2.46 |
| 36 | 209.1168 | n.a.                           | no      |                     | 0.070   | 1.35 |
| 37 | 209.1536 | n.a.                           | no      |                     | 0.265   | 0.86 |
| 38 | 221.1532 | n.a.                           | no      |                     | 0.183   | 1.45 |

|    |          |      |    |       |      |
|----|----------|------|----|-------|------|
| 39 | 221.19   | n.a. | no | 0.881 | 1.65 |
| 40 | 223.1327 | n.a. | no | 0.155 | 1.34 |
| 41 | 237.1123 | n.a. | no | 0.145 | 0.95 |
| 42 | 251.1641 | n.a. | no | 0.318 | 3.61 |

**Table S4:** Cohort characteristics with stratification criterion applied for the treated OSA group.

|                             | OSA untreated     | OSA treated <sup>a</sup> |
|-----------------------------|-------------------|--------------------------|
| N                           | 43                | 29                       |
| Age (y)                     | 61 (55.0, 69)     | 65 (59, 70)              |
| Sex, male, N (%)            | 36 (84)           | 25 (86)                  |
| BMI (kg/m <sup>2</sup> )    | 29.5 (27.0, 34.0) | 30.1 (27.8, 32.6)        |
| AHI at diagnosis (events/h) | 30.2 (24.0, 45.0) | 35.0 (24.0, 13.5)        |
| AHI at visit (events/h)     | 28.0 (18.8, 40.0) | 1.2 (0.8, 4.4)           |
| ESS at visit, points        | 5.0 (3.0, 9.0)    | 6.0 (2.5, 8.5)           |

BMI: body mass index, AHI: apnea/hypopnea index, ESS: Epworth Sleepiness Scale. Values are presented as median  $\pm$  interquartile range (IQR) unless otherwise stated. <sup>a</sup>stratification: averaged CPAP usage  $\geq$  5 h/night.

## Testing for normality and significant differences

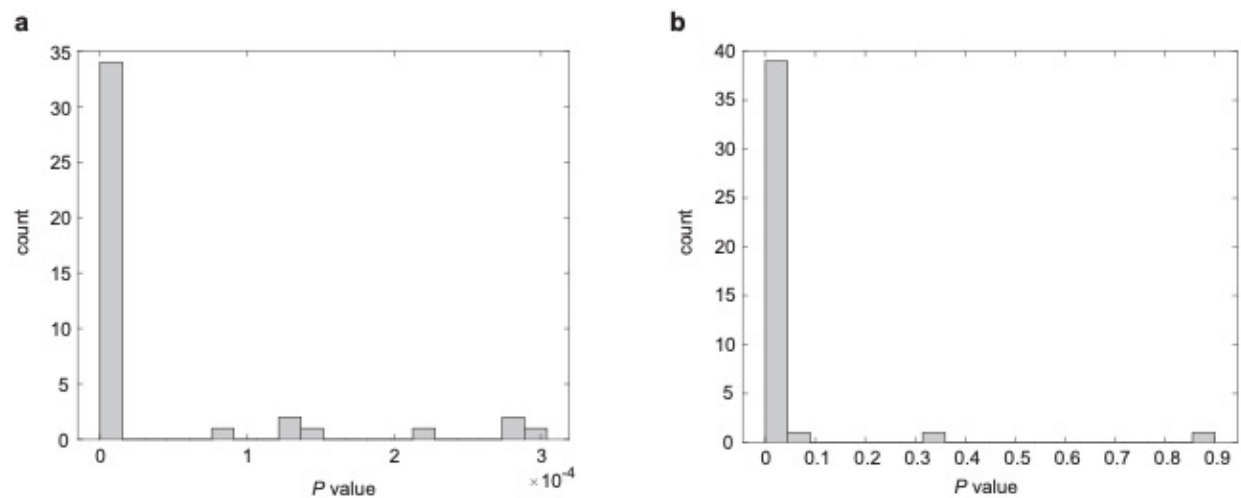

**Figure S1:** Shapiro-Wilk test for normality on the detected marker intensities in **a)** untreated and **b)** treated OSA. Stratification criterion:  $\geq 5$  h/night averaged CPAP usage.

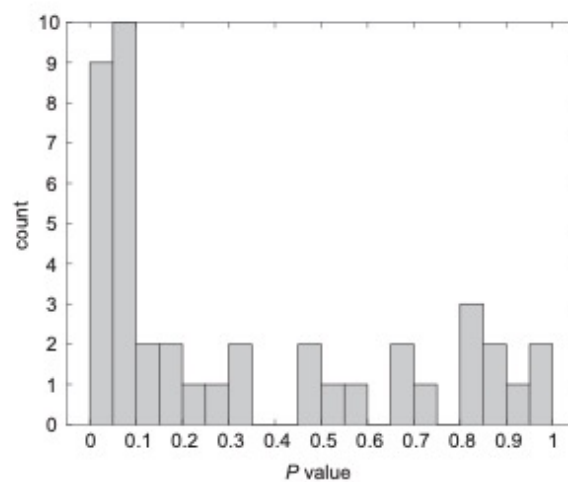

**Figure S2:** Mann-Whitney U test to determine significantly different OSA-associated metabolites between untreated and treated OSA patients. Stratification criterion:  $\geq 5$  h/night averaged CPAP usage, statistically significant markers:  $P < 0.05$ .

## Classification performance

- 1) Prediction for patients with treated and untreated OSA, unbalanced group size

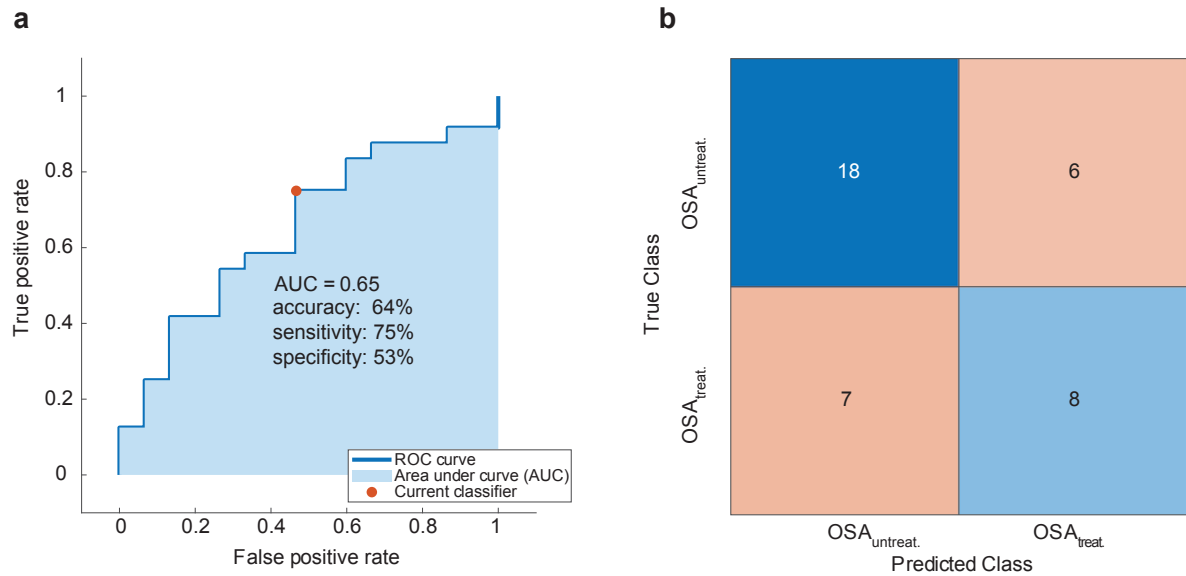

**Figure S3:** Classification performance of the 42 detected features for untreated OSA (OSA<sub>untreat.</sub>, N=24) and treated OSA (OSA<sub>treat.</sub>, N=15). Stratification criteria for the treated OSA group:  $\geq 5$  h/night averaged CPAP usage, and for both groups: AHI>30, or AHI>10 and ESS>10. **a)** Receiver operating characteristic (ROC) curve for OSA prediction from a 10-fold cross-validation applying the k-nearest neighbors algorithm resulted in an averaged area under the curve (AUC) of 0.65, **b)** confusion matrix for the prediction of untreated and treated OSA.

## 2) Prediction for patients with untreated OSA and control subjects

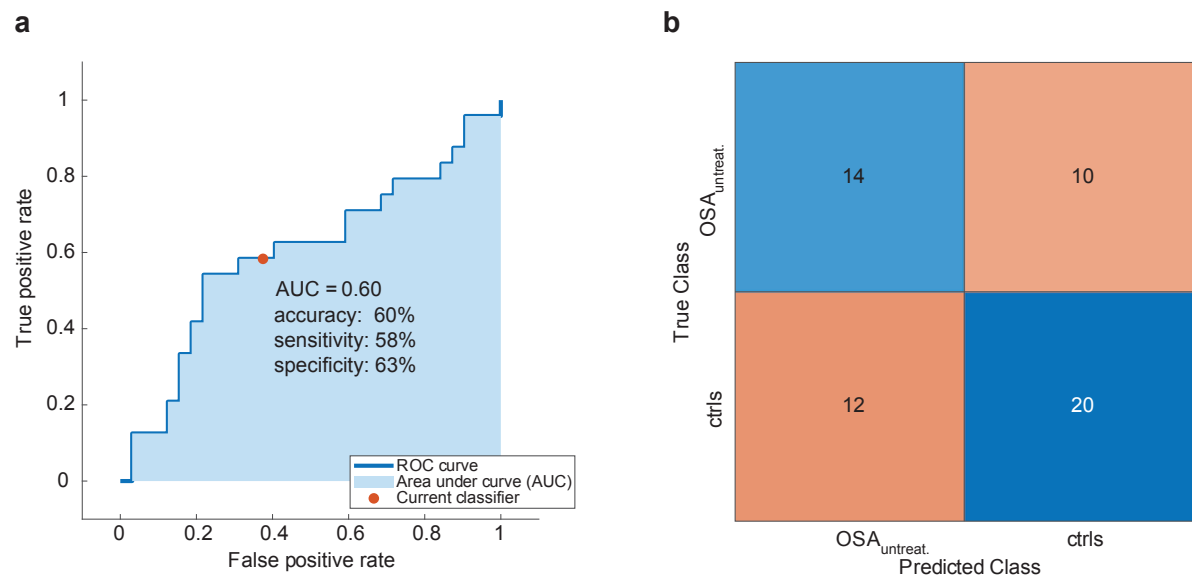

**Figure S4:** Classification performance of the 42 detected features for untreated OSA (N=24) and control subjects (ctrls, N=32). Stratification criteria for untreated OSA (OSA<sub>untreat.</sub>): AHI>30, or AHI>10 and ESS>10. **a)** Receiver operating characteristic (ROC) curve for OSA prediction from a 10-fold cross-validation applying the ensemble methods resulted in an averaged area under the curve (AUC) of 0.60, **b)** confusion matrix for the prediction of untreated OSA and controls.

## 3) Predictions with different study groups

**Table S5:** Classification performances of 42 confirmed markers applied on the different study groups.

|                               | N<br>(OSA) | N<br>(OSA <sub>treat.</sub> ) | N<br>(ctrls) | AUC  | accuracy<br>(%) | sensitivity<br>(%) | specificity<br>(%) |
|-------------------------------|------------|-------------------------------|--------------|------|-----------------|--------------------|--------------------|
| a) OSA, OSA <sub>treat.</sub> |            |                               |              |      |                 |                    |                    |
| a.1) unbalanced               | 24         | 15                            | 0            | 0.65 | 64              | 75                 | 53                 |
| a.2) balanced                 | 15         | 15                            | 0            | 0.80 | 77              | 73                 | 80                 |
| b) OSA, ctrls                 |            |                               |              |      |                 |                    |                    |
| b.1) unbalanced               | 24         | 0                             | 32           | 0.60 | 60              | 58                 | 63                 |
| b.2) balanced                 | 24         | 0                             | 24           | 0.61 | 60              | 63                 | 58                 |

Applied stratification criteria for untreated OSA (OSA) and treated OSA (OSA<sub>treat.</sub>): AHI>30, or AHI>10 and ESS>10, additional for treated OSA: ≥ 5 h/night CPAP usage. AUC: area under the curve.
